# Supplementary material
Source: Springer Nature journal article supplement (https://www.springermedizin.de/resource/supplementary/12905_2013_438_MOESM1_ESM.pdf/9518780)

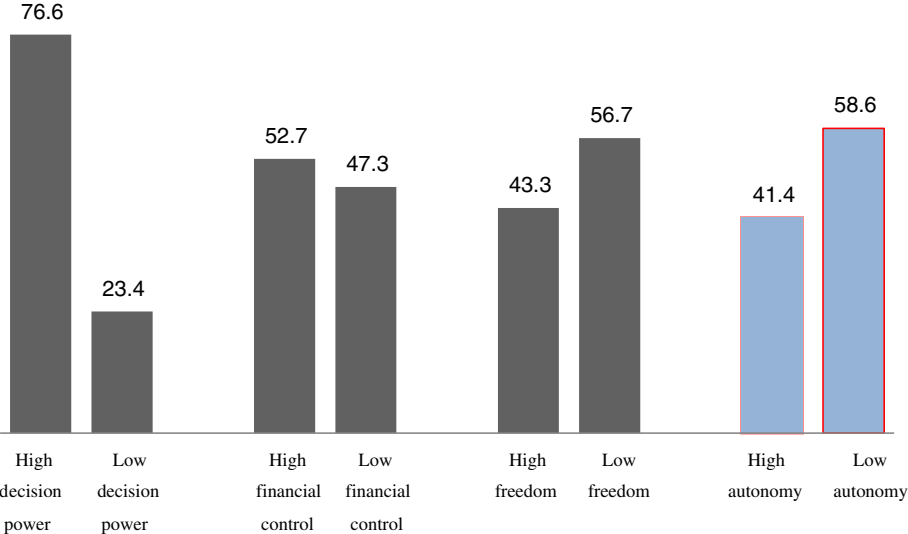

Supplement: MOESM1 [file 9518780]
